# Supplementary material for: Impact of national commissioning of pre-exposure prophylaxis (PrEP) on equity of access in England: a PrEP-to-need ratio investigation
Source: HighWire-hosted journal article supplement (doi:10.1136/sextrans-2023-055989), 2024-03-20
Supplement: sextrans-2023-055989supp001_data_supplement.pdf [file sextrans-2023-055989supp001_data_supplement.pdf]

## Supplementary material 1

**Table 1.** Distribution of the number of PrEP users and PrEP need in England during the pre- (PrEP Impact Trial – October 2017 to February 2020) and post-commissioning (2021) period of PrEP by age and gender (including transgender and sexual orientation minorities)

| Age         | Gender                          | Pre-commissioning (Oct 2017 – Feb 2020) |                           |            |                                  | Post-commissioning (2021) |                           |             |                                  | Pre- to post-commissioning comparisons within groups | Pre- to post-commissioning comparisons across groups |
|-------------|---------------------------------|-----------------------------------------|---------------------------|------------|----------------------------------|---------------------------|---------------------------|-------------|----------------------------------|------------------------------------------------------|------------------------------------------------------|
|             |                                 | PrEP users N (%)                        | Non-late new HIV dx N (%) | PnR        | PnR relative difference (95% CI) | PrEP users N (%)          | Non-late new HIV dx N (%) | PnR         | PnR relative difference (95% CI) | PnR relative difference (95% CI)                     | PnR relative difference (95% CI)                     |
| Overall     | <b>Total</b>                    | <b>21,292 (100.0%)</b>                  | <b>5,019 (100.0%)</b>     | <b>4.2</b> | <b>N/A</b>                       | <b>60,384 (100.0%)</b>    | <b>1,234 (100.0%)</b>     | <b>48.9</b> | <b>N/A</b>                       | <b>11.53* (10.82-12.30)</b>                          | <b>N/A</b>                                           |
|             | Men, of which:                  | 20,626 (96.9%)                          | 3,797 (75.7%)             | 5.4        | Baseline group                   | 57,169 (94.7%)            | 895 (72.5%)               | 63.9        | Baseline group                   | 11.76* (10.91-12.67)                                 | Baseline group                                       |
|             | <i>MSM</i>                      | 20,349 (95.6%)                          | 2,423 (48.3%)             | 8.4        | N/A                              | 49,543 (82.0%)            | 483 (39.1%)               | 102.6       | N/A                              | 12.21* (11.06-13.48)                                 | N/A                                                  |
|             | <i>Heterosexual men</i>         | 277 (1.3%)                              | 1,374 (27.4%)             | 0.2        | N/A                              | 7,626 (12.6%)             | 412 (33.4%)               | 18.5        | N/A                              | 91.81* (78.02-108.04)                                | N/A                                                  |
|             | Women                           | 623 (2.9%)                              | 1,219 (24.3%)             | 0.5        | 0.09* (0.08-0.10)                | 1,198 (2.0%)              | 338 (27.4%)               | 3.5         | 0.06* (0.05-0.06)                | 6.94* (5.94-8.09)                                    | 0.59* (0.50-0.70)                                    |
|             | Transgender people <sup>1</sup> | 456 (2.1%)                              | 9 (0.2%)                  | 50.7       | N/A                              | 527 (0.9%)                | 4 (0.3%)                  | 131.6       | N/A                              | 2.60 (0.80-8.50)                                     | N/A                                                  |
| 16 to 24    | Men                             | 2,973 (14.0%)                           | 538 (10.7%)               | 5.5        | Baseline group                   | 8,691 (14.4%)             | 104 (8.4%)                | 83.6        | Baseline group                   | 15.12* (12.21-18.73)                                 | Baseline group                                       |
|             | Women                           | 115 (0.5%)                              | 146 (2.9%)                | 0.8        | 0.14* (0.11-0.19)                | 261 (0.4%)                | 27 (2.2%)                 | 9.7         | 0.12* (0.07-0.18)                | 12.27* (7.70-19.55)                                  | 0.81 (0.49-1.35)                                     |
|             | <b>Subtotal</b>                 | <b>3,104 (14.6%)</b>                    | <b>686 (13.7%)</b>        | <b>4.5</b> | <b>N/A</b>                       | <b>9,313 (15.4%)</b>      | <b>132 (10.7%)</b>        | <b>70.6</b> | <b>N/A</b>                       | <b>15.59* (12.89-18.87)</b>                          | <b>N/A</b>                                           |
| 25 to 34    | Men                             | 8,348 (39.2%)                           | 1,338 (26.7%)             | 6.2        | 1.13** (1.01-1.26)               | 23,603 (39.1%)            | 327 (26.5%)               | 72.2        | 0.86 (0.69-1.08)                 | 11.57* (10.23-13.09)                                 | 0.77** (0.60-0.98)                                   |
|             | Women                           | 251 (1.2%)                              | 325 (6.5%)                | 0.8        | 0.14* (0.12-0.17)                | 492 (0.8%)                | 85 (6.9%)                 | 5.8         | 0.07* (0.05-0.09)                | 7.49* (5.65-9.95)                                    | 0.50* (0.35-0.71)                                    |
|             | <b>Subtotal</b>                 | <b>8,617 (40.5%)</b>                    | <b>1,664 (33.2%)</b>      | <b>5.2</b> | <b>N/A</b>                       | <b>24,830 (41.1%)</b>     | <b>412 (33.4%)</b>        | <b>60.3</b> | <b>N/A</b>                       | <b>11.64* (10.42-13.00)</b>                          | <b>N/A</b>                                           |
| 35 to 49    | Men                             | 6,832 (32.1%)                           | 1,231 (24.5%)             | 5.5        | 1.00 (0.90-1.12)                 | 17,972 (29.8%)            | 314 (25.4%)               | 57.2        | 0.68* (0.55-0.86)                | 10.31* (9.08-11.71)                                  | 0.68* (0.53-0.87)                                    |
|             | Women                           | 182 (0.9%)                              | 474 (9.4%)                | 0.4        | 0.07* (0.06-0.08)                | 348 (0.6%)                | 154 (12.5%)               | 2.3         | 0.03* (0.02-0.04)                | 5.89* (4.56-7.60)                                    | 0.39* (0.28-0.54)                                    |
|             | <b>Subtotal</b>                 | <b>7,021 (33.0%)</b>                    | <b>1,705 (34.0%)</b>      | <b>4.1</b> | <b>N/A</b>                       | <b>18,889 (31.3%)</b>     | <b>468 (37.9%)</b>        | <b>40.4</b> | <b>N/A</b>                       | <b>9.80* (8.82-10.90)</b>                            | <b>N/A</b>                                           |
| 50 to 64    | Men                             | 2,202 (10.3%)                           | 579 (11.5%)               | 3.8        | 0.69* (0.60-0.78)                | 6,184 (10.2%)             | 119 (9.6%)                | 52.0        | 0.62* (0.48-0.81)                | 13.66* (11.15-16.74)                                 | 0.90 (0.67-1.21)                                     |
|             | Women                           | 64 (0.3%)                               | 226 (4.5%)                | 0.3        | 0.05* (0.04-0.07)                | 88 (0.1%)                 | 65 (5.3%)                 | 1.4         | 0.02* (0.01-0.02)                | 4.78* (3.13-7.31)                                    | 0.32* (0.20-0.51)                                    |
|             | <b>Subtotal</b>                 | <b>2,267 (10.6%)</b>                    | <b>805 (16.0%)</b>        | <b>2.8</b> | <b>N/A</b>                       | <b>6,583 (10.9%)</b>      | <b>184 (14.9%)</b>        | <b>35.8</b> | <b>N/A</b>                       | <b>12.70* (10.75-15.02)</b>                          | <b>N/A</b>                                           |
| 65 and over | Men                             | 271 (1.3%)                              | 111 (2.2%)                | 2.4        | 0.44* (0.35-0.56)                | 718 (1.2%)                | 31 (2.5%)                 | 23.2        | 0.28* (0.18-0.42)                | 9.49* (6.22-14.47)                                   | 0.63** (0.39-1.01)                                   |
|             | Women                           | 11 (0.1%)                               | 48 (1.0%)                 | 0.2        | 0.04* (0.02-0.08)                | 7 (0.0%)                  | 7 (0.6%)                  | 1.0         | 0.01* (0.00-0.03)                | 4.36** (1.27-15.01)                                  | 0.29** (0.08-1.01)                                   |
|             | <b>Subtotal</b>                 | <b>283 (1.3%)</b>                       | <b>159 (3.2%)</b>         | <b>1.8</b> | <b>N/A</b>                       | <b>766 (1.3%)</b>         | <b>38 (3.1%)</b>          | <b>20.2</b> | <b>N/A</b>                       | <b>11.33* (7.75-16.55)</b>                           | <b>N/A</b>                                           |

<sup>1</sup> Transgender people includes transgender men, transgender women and those who identified as non-binary and was only available for the national gender breakdown to avoid small number masking, as required by UKHSA data request policy.

\* p-value<0.01

\*\*p-value<0.1

**Table 2.** Distribution of the number of PrEP users and PrEP need in England during the pre- (PrEP Impact Trial – October 2017 to February 2020) and post-commissioning (2021) period of PrEP by ethnicity and gender

| Ethnicity                   | Gender          | Pre-commissioning (Oct 2017 – Feb 2020) |                           |            |                                  | Post-commissioning (2021) |                           |             |                                  | Pre- to post-commissioning comparisons within groups | Pre- to post-commissioning comparisons across groups |
|-----------------------------|-----------------|-----------------------------------------|---------------------------|------------|----------------------------------|---------------------------|---------------------------|-------------|----------------------------------|------------------------------------------------------|------------------------------------------------------|
|                             |                 | PrEP users N (%)                        | Non-late new HIV dx N (%) | PnR        | PnR relative difference (95% CI) | PrEP users N (%)          | Non-late new HIV dx N (%) | PnR         | PnR relative difference (95% CI) | PnR relative difference (95% CI)                     | PnR relative difference (95% CI)                     |
| White                       | Men             | 15,669 (73.6%)                          | 2,196 (43.8%)             | 7.1        | Baseline group                   | 41,765 (69.2%)            | 435 (35.3%)               | 96.0        | Baseline group                   | 13.46* (12.12-14.94)                                 | Baseline group                                       |
|                             | Women           | 367 (1.7%)                              | 367 (7.3%)                | 1.0        | 0.14* (0.12-0.16)                | 714 (1.2%)                | 90 (7.3%)                 | 7.9         | 0.08* (0.07-0.10)                | 7.93* (6.10-10.32)                                   | 0.59* (0.44-0.78)                                    |
|                             | <b>Subtotal</b> | <b>16,061 (75.4%)</b>                   | <b>2,564 (51.1%)</b>      | <b>6.3</b> | <b>N/A</b>                       | <b>44,106 (73.0%)</b>     | <b>526 (42.6%)</b>        | <b>83.9</b> | <b>N/A</b>                       | <b>13.39* (12.17-14.73)</b>                          | <b>N/A</b>                                           |
| Black African               | Men             | 339 (1.6%)                              | 293 (5.8%)                | 1.2        | 0.16* (0.14-0.19)                | 1,050 (1.7%)              | 79 (6.4%)                 | 13.3        | 0.14* (0.11-0.18)                | 11.49* (8.71-15.15)                                  | 0.85 (0.63-1.15)                                     |
|                             | Women           | 36 (0.2%)                               | 395 (7.9%)                | 0.1        | 0.01* (0.01-0.02)                | 42 (0.1%)                 | 122 (9.9%)                | 0.3         | 0.00* (0.00-0.01)                | 3.78* (2.32-6.16)                                    | 0.28* (0.17-0.46)                                    |
|                             | <b>Subtotal</b> | <b>376 (1.8%)</b>                       | <b>688 (13.7%)</b>        | <b>0.5</b> | <b>N/A</b>                       | <b>1,131 (1.9%)</b>       | <b>201 (16.3%)</b>        | <b>5.6</b>  | <b>N/A</b>                       | <b>10.30* (8.47-12.52)</b>                           | <b>N/A</b>                                           |
| Black Caribbean             | Men             | 341 (1.6%)                              | 86 (1.7%)                 | 4.0        | 0.56* (0.44-0.71)                | 964 (1.6%)                | 28 (2.3%)                 | 34.4        | 0.36* (0.24-0.53)                | 8.68* (5.57-13.54)                                   | 0.65** (0.41-1.02)                                   |
|                             | Women           | 9 (0.0%)                                | 38 (0.8%)                 | 0.2        | 0.03* (0.02-0.07)                | 19 (0.0%)                 | 15 (1.2%)                 | 1.3         | 0.01* (0.01-0.03)                | 5.35* (1.98-14.44)                                   | 0.40** (0.15-1.08)                                   |
|                             | <b>Subtotal</b> | <b>350 (1.6%)</b>                       | <b>124 (2.5%)</b>         | <b>2.8</b> | <b>N/A</b>                       | <b>996 (1.6%)</b>         | <b>43 (3.5%)</b>          | <b>23.2</b> | <b>N/A</b>                       | <b>8.21* (5.68-11.85)</b>                            | <b>N/A</b>                                           |
| Black Other                 | Men             | 128 (0.6%)                              | 66 (1.3%)                 | 1.9        | 0.27* (0.20-0.37)                | 336 (0.6%)                | 22 (1.8%)                 | 15.3        | 0.16* (0.10-0.25)                | 7.88* (4.66-13.30)                                   | 0.59** (0.34-1.00)                                   |
|                             | Women           | 6 (0.0%)                                | 43 (0.9%)                 | 0.1        | 0.02* (0.01-0.05)                | 13 (0.0%)                 | 7 (0.6%)                  | 1.9         | 0.02* (0.01-0.05)                | 13.31* (3.80-46.67)                                  | 0.99 (0.28-3.48)                                     |
|                             | <b>Subtotal</b> | <b>134 (0.6%)</b>                       | <b>109 (2.2%)</b>         | <b>1.2</b> | <b>N/A</b>                       | <b>358 (0.6%)</b>         | <b>29 (2.4%)</b>          | <b>12.3</b> | <b>N/A</b>                       | <b>10.04* (6.37-15.83)</b>                           | <b>N/A</b>                                           |
| Asian                       | Men             | 1,041 (4.9%)                            | 240 (4.8%)                | 4.3        | 0.61* (0.52-0.70)                | 4,413 (7.3%)              | 69 (5.6%)                 | 64.0        | 0.67* (0.52-0.86)                | 14.75* (11.19-19.43)                                 | 1.10 (0.82-1.47)                                     |
|                             | Women           | 46 (0.2%)                               | 51 (1.0%)                 | 0.9        | 0.13* (0.08-0.19)                | 86 (0.1%)                 | 13 (1.1%)                 | 6.6         | 0.07* (0.04-0.12)                | 7.33* (3.62-14.86)                                   | 0.55** (0.27-1.11)                                   |
|                             | <b>Subtotal</b> | <b>1,092 (5.1%)</b>                     | <b>292 (5.8%)</b>         | <b>3.7</b> | <b>N/A</b>                       | <b>4,616 (7.6%)</b>       | <b>82 (6.6%)</b>          | <b>56.3</b> | <b>N/A</b>                       | <b>15.05* (11.68-19.40)</b>                          | <b>N/A</b>                                           |
| Mixed/ other                | Men             | 1,646 (7.7%)                            | 411 (8.2%)                | 4.0        | 0.56* (0.50-0.63)                | 4,675 (7.7%)              | 76 (6.2%)                 | 61.5        | 0.64* (0.50-0.82)                | 15.36* (11.95-19.74)                                 | 1.14 (0.87-1.50)                                     |
|                             | Women           | 87 (0.4%)                               | 85 (1.7%)                 | 1.0        | 0.14* (0.11-0.19)                | 175 (0.3%)                | 25 (2.0%)                 | 7.0         | 0.07* (0.05-0.11)                | 6.84* (4.09-11.44)                                   | 0.51** (0.30-0.86)                                   |
|                             | <b>Subtotal</b> | <b>1,740 (8.2%)</b>                     | <b>497 (9.9%)</b>         | <b>3.5</b> | <b>N/A</b>                       | <b>4,960 (8.2%)</b>       | <b>101 (8.2%)</b>         | <b>49.1</b> | <b>N/A</b>                       | <b>14.03* (11.25-17.49)</b>                          | <b>N/A</b>                                           |
| Not stated                  | Men             | 1,462 (6.9%)                            | 505 (10.1%)               | 2.9        | 0.41* (0.36-0.45)                | 3,966 (6.6%)              | 186 (15.1%)               | 21.3        | 0.22* (0.19-0.26)                | 7.37* (6.16-8.80)                                    | 0.55* (0.45-0.67)                                    |
|                             | Women           | 72 (0.3%)                               | 240 (4.8%)                | 0.3        | 0.04* (0.03-0.05)                | 149 (0.2%)                | 66 (5.3%)                 | 2.3         | 0.02* (0.02-0.03)                | 7.53* (5.09-11.13)                                   | 0.56* (0.37-0.84)                                    |
|                             | <b>Subtotal</b> | <b>1,539 (7.2%)</b>                     | <b>745 (14.8%)</b>        | <b>2.1</b> | <b>N/A</b>                       | <b>4,217 (7.0%)</b>       | <b>252 (20.4%)</b>        | <b>16.7</b> | <b>N/A</b>                       | <b>8.10* (6.94-9.45)</b>                             | <b>N/A</b>                                           |
| Latin American <sup>2</sup> | Men             | 714 (3.4%)                              | 216 (4.3%)                | 3.3        | 0.46* (0.40-0.54)                | 2,459 (4.1%)              | 49 (4.0%)                 | 50.2        | 0.52* (0.39-0.70)                | 15.18* (11.01-20.93)                                 | 1.13 (0.80-1.58)                                     |
|                             | Women           | 81 (0.4%)                               | 21 (0.4%)                 | 3.9        | 0.54** (0.33-0.88)               | 218 (0.4%)                | 4 (0.3%)                  | 54.5        | 0.57 (0.21-1.53)                 | 14.13* (4.71-42.42)                                  | 1.05 (0.35-3.17)                                     |
|                             | <b>Subtotal</b> | <b>796 (3.7%)</b>                       | <b>238 (4.7%)</b>         | <b>3.3</b> | <b>N/A</b>                       | <b>2,702 (4.5%)</b>       | <b>52 (4.2%)</b>          | <b>52.0</b> | <b>N/A</b>                       | <b>15.54* (11.39-21.19)</b>                          | <b>N/A</b>                                           |

<sup>2</sup> Latin American is not an ethnicity readily available in the GUMCAD and HARS datasets and was derived from the attendee's country of birth (Belize, Costa Rica, El Salvador, Guatemala, Honduras, Mexico, Nicaragua, Panama, Argentina, Bolivia, Bouvet, Brazil, Chile, Colombia, Ecuador, Falkland Islands, French Guiana, Guyana, Paraguay, Peru, South Georgia and the South Sandwich Islands, Suriname, Uruguay, Venezuela)

\* p-value<0.01

\*\* p-value<0.1

**Table 3.** Distribution of the number of PrEP users and PrEP need in England during the pre- (PrEP Impact Trial – October 2017 to February 2020) and post-commissioning (2021) period of PrEP by region of residence and gender.

| Region                     | Gender          | Pre-commissioning (Oct 2017 – Feb 2020) |                           |            |                                  | Post-commissioning (2021) |                           |             |                                  | Pre- to post-commissioning comparisons within groups | Pre- to post-commissioning comparisons across groups |
|----------------------------|-----------------|-----------------------------------------|---------------------------|------------|----------------------------------|---------------------------|---------------------------|-------------|----------------------------------|------------------------------------------------------|------------------------------------------------------|
|                            |                 | PrEP users N (%)                        | Non-late new HIV dx N (%) | PnR        | PnR relative difference (95% CI) | PrEP users N (%)          | Non-late new HIV dx N (%) | PnR         | PnR relative difference (95% CI) | PnR relative difference (95% CI)                     | PnR relative difference (95% CI)                     |
| London                     | Men             | 10,927 (52.1%)                          | 1,706 (34.0%)             | 6.4        | Baseline group                   | 32,708 (55.2%)            | 318 (25.8%)               | 102.9       | Baseline group                   | 16.06* (14.22-18.14)                                 | Baseline group                                       |
|                            | Women           | 330 (1.6%)                              | 454 (9.0%)                | 0.7        | 0.11* (0.10-0.13)                | 668 (1.1%)                | 108 (8.8%)                | 6.2         | 0.06* (0.05-0.08)                | 8.51* (6.64-10.90)                                   | 0.53* (0.40-0.70)                                    |
|                            | <b>Subtotal</b> | <b>11,275 (53.8%)</b>                   | <b>2,161 (43.1%)</b>      | <b>5.2</b> | <b>N/A</b>                       | <b>33,569 (56.6%)</b>     | <b>426 (34.5%)</b>        | <b>78.8</b> | <b>N/A</b>                       | <b>15.10* (13.58-16.79)</b>                          | <b>N/A</b>                                           |
| Midlands & East of England | Men             | 2,518 (12.0%)                           | 737 (14.7%)               | 3.4        | 0.53* (0.48-0.59)                | 5,816 (9.8%)              | 218 (17.7%)               | 26.7        | 0.26* (0.22-0.31)                | 7.81* (6.67-9.15)                                    | 0.49* (0.40-0.59)                                    |
|                            | Women           | 92 (0.4%)                               | 334 (6.7%)                | 0.3        | 0.04* (0.03-0.05)                | 152 (0.3%)                | 96 (7.8%)                 | 1.6         | 0.02* (0.01-0.02)                | 5.75* (4.07-8.11)                                    | 0.36* (0.25-0.52)                                    |
|                            | <b>Subtotal</b> | <b>2,615 (12.5%)</b>                    | <b>1,072 (21.4%)</b>      | <b>2.4</b> | <b>N/A</b>                       | <b>6,726 (11.3%)</b>      | <b>314 (25.4%)</b>        | <b>21.4</b> | <b>N/A</b>                       | <b>8.78* (7.68-10.04)</b>                            | <b>N/A</b>                                           |
| North of England           | Men             | 3,274 (15.6%)                           | 783 (15.6%)               | 4.2        | 0.65* (0.59-0.72)                | 9,231 (15.6%)             | 207 (16.8%)               | 44.6        | 0.43* (0.36-0.52)                | 10.67* (9.10-12.49)                                  | 0.66* (0.54-0.81)                                    |
|                            | Women           | 84 (0.4%)                               | 233 (4.6%)                | 0.4        | 0.06* (0.04-0.07)                | 180 (0.3%)                | 78 (6.3%)                 | 2.3         | 0.02* (0.02-0.03)                | 6.40* (4.45-9.22)                                    | 0.40* (0.27-0.59)                                    |
|                            | <b>Subtotal</b> | <b>3,366 (16.1%)</b>                    | <b>1,016 (20.2%)</b>      | <b>3.3</b> | <b>N/A</b>                       | <b>9,858 (16.6%)</b>      | <b>285 (23.1%)</b>        | <b>34.6</b> | <b>N/A</b>                       | <b>10.44* (9.10-11.97)</b>                           | <b>N/A</b>                                           |
| South of England           | Men             | 3,595 (17.2%)                           | 571 (11.4%)               | 6.3        | 0.98 (0.89-1.09)                 | 8,454 (14.3%)             | 152 (12.3%)               | 55.6        | 0.54* (0.45-0.66)                | 8.83* (7.36-10.61)                                   | 0.55* (0.44-0.69)                                    |
|                            | Women           | 94 (0.4%)                               | 198 (3.9%)                | 0.5        | 0.07* (0.06-0.10)                | 179 (0.3%)                | 56 (4.5%)                 | 3.2         | 0.03* (0.02-0.04)                | 6.73* (4.57-9.92)                                    | 0.42* (0.28-0.63)                                    |
|                            | <b>Subtotal</b> | <b>3,700 (17.7%)</b>                    | <b>770 (15.3%)</b>        | <b>4.8</b> | <b>N/A</b>                       | <b>9,147 (15.4%)</b>      | <b>209 (16.9%)</b>        | <b>43.8</b> | <b>N/A</b>                       | <b>9.11* (7.78-10.66)</b>                            | <b>N/A</b>                                           |

\*p-value&lt;0.01

**Table 4.** Distribution of the number of PrEP users and PrEP need in England during the pre- (PrEP Impact Trial – October 2017 to February 2020) and post-commissioning (2021) period of PrEP by region of residence and ethnicity.

| Region                     | Ethnicity                | Pre-commissioning (Oct 2017 - Feb 2020) |                                |             |                    | Post-commissioning (2021) |                                |              |                    | Pre- to post-commissioning comparisons within groups | Pre- to post-commissioning comparisons across groups |
|----------------------------|--------------------------|-----------------------------------------|--------------------------------|-------------|--------------------|---------------------------|--------------------------------|--------------|--------------------|------------------------------------------------------|------------------------------------------------------|
|                            |                          | PrEP users (%)                          | Non-late new HIV diagnoses (%) | PnR         | PnR ratio (95% CI) | PrEP users (%)            | Non-late new HIV diagnoses (%) | PnR          | PnR ratio (95% CI) | PnR ratio (95% CI)                                   | PnR ratio (95% CI)                                   |
| London                     | White                    | 7,655 (36.5%)                           | 883 (17.6%)                    | 8.67        | Baseline group     | 22,371 (37.7%)            | 134 (10.9%)                    | 166.95       | Baseline group     | 19.26* (16.03-23.14)                                 | Baseline group                                       |
|                            | Black African            | 261 (1.2%)                              | 282 (5.6%)                     | 0.93        | 0.11* (0.09-0.13)  | 843 (1.4%)                | 64 (5.2%)                      | 13.17        | 0.08* (0.06-0.11)  | 14.23 (10.49-19.30)                                  | 0.74** (0.52-1.05)                                   |
|                            | Black other <sup>3</sup> | 385 (1.8%)                              | 138 (2.7%)                     | 2.79        | 0.32* (0.26-0.40)  | 1,032 (1.7%)              | 36 (2.9%)                      | 28.67        | 0.17* (0.12-0.25)  | 10.28* (6.99-15.10)                                  | 0.53* (0.35-0.82)                                    |
|                            | Asian                    | 702 (3.3%)                              | 138 (2.7%)                     | 5.09        | 0.59* (0.48-0.71)  | 3,145 (5.3%)              | 33 (2.7%)                      | 95.30        | 0.57* (0.39-0.84)  | 18.73* (12.70-27.63)                                 | 0.97 (0.63-1.50)                                     |
|                            | Mixed/other              | 1,253 (6.0%)                            | 311 (6.2%)                     | 4.03        | 0.46* (0.40-0.54)  | 3,594 (6.1%)              | 43 (3.5%)                      | 83.58        | 0.50* (0.35-0.71)  | 20.75* (14.98-28.72)                                 | 1.08 (0.74-1.57)                                     |
|                            | Not stated               | 1,019 (4.9%)                            | 409 (8.1%)                     | 2.49        | 0.29* (0.25-0.33)  | 2,584 (4.4%)              | 116 (9.4%)                     | 22.28        | 0.13* (0.10-0.17)  | 8.94* (7.19-11.12)                                   | 0.46* (0.35-0.62)                                    |
|                            | <b>Subtotal</b>          | <b>11,275 (53.8%)</b>                   | <b>2,161 (43.1%)</b>           | <b>5.22</b> | <b>N/A</b>         | <b>33,569 (56.6%)</b>     | <b>426 (34.5%)</b>             | <b>78.80</b> | <b>N/A</b>         | <b>15.10* (13.58-16.79)</b>                          | <b>N/A</b>                                           |
| Midlands & East of England | White                    | 2,138 (10.2%)                           | 554 (11.0%)                    | 3.86        | 0.45* (0.40-0.50)  | 5,285 (8.9%)              | 132 (10.7%)                    | 40.04        | 0.24* (0.19-0.31)  | 10.37* (8.52-12.63)                                  | 0.54* (0.41-0.70)                                    |
|                            | Black African            | 37 (0.2%)                               | 194 (3.9%)                     | 0.19        | 0.02* (0.02-0.03)  | 99 (0.2%)                 | 63 (5.1%)                      | 1.57         | 0.01* (0.01-0.01)  | 8.24* (5.14-13.22)                                   | 0.43* (0.26-0.71)                                    |
|                            | Black other              | 35 (0.2%)                               | 48 (1.0%)                      | 0.73        | 0.08* (0.05-0.13)  | 119 (0.2%)                | 18 (1.5%)                      | 6.61         | 0.04* (0.02-0.07)  | 9.07* (4.69-17.54)                                   | 0.47** (0.24-0.93)                                   |
|                            | Asian                    | 154 (0.7%)                              | 73 (1.5%)                      | 2.11        | 0.24* (0.18-0.32)  | 478 (0.8%)                | 26 (2.1%)                      | 18.38        | 0.11* (0.07-0.17)  | 8.71* (5.38-14.13)                                   | 0.45* (0.27-0.76)                                    |
|                            | Mixed/other              | 130 (0.6%)                              | 59 (1.2%)                      | 2.20        | 0.25* (0.19-0.35)  | 316 (0.5%)                | 19 (1.5%)                      | 16.63        | 0.10* (0.06-0.16)  | 7.55* (4.33-13.16)                                   | 0.39* (0.22-0.70)                                    |
|                            | Not stated               | 121 (0.6%)                              | 144 (2.9%)                     | 0.84        | 0.10* (0.08-0.12)  | 429 (0.7%)                | 56 (4.5%)                      | 7.66         | 0.05* (0.03-0.06)  | 9.12* (6.31-13.18)                                   | 0.47* (0.31-0.71)                                    |
|                            | <b>Subtotal</b>          | <b>2,615 (12.5%)</b>                    | <b>1,072 (21.4%)</b>           | <b>2.44</b> | <b>N/A</b>         | <b>6,726 (11.3%)</b>      | <b>314 (25.4%)</b>             | <b>21.42</b> | <b>N/A</b>         | <b>8.78* (7.68-10.04)</b>                            | <b>N/A</b>                                           |
| North of England           | White                    | 2,958 (14.1%)                           | 645 (12.9%)                    | 4.59        | 0.53* (0.47-0.59)  | 8,034 (13.5%)             | 149 (12.1%)                    | 53.92        | 0.32* (0.26-0.41)  | 11.76* (9.79-14.12)                                  | 0.61* (0.47-0.79)                                    |
|                            | Black African            | 34 (0.2%)                               | 125 (2.5%)                     | 0.27        | 0.03* (0.02-0.05)  | 102 (0.2%)                | 40 (3.2%)                      | 2.55         | 0.02* (0.01-0.02)  | 9.38* (5.54-15.88)                                   | 0.49** (0.28-0.85)                                   |
|                            | Black other              | 24 (0.1%)                               | 24 (0.5%)                      | 1.00        | 0.12* (0.07-0.20)  | 107 (0.2%)                | 7 (0.6%)                       | 15.29        | 0.09* (0.04-0.20)  | 15.29* (5.90-39.57)                                  | 0.79 (0.30-2.09)                                     |
|                            | Asian                    | 108 (0.5%)                              | 40 (0.8%)                      | 2.70        | 0.31* (0.22-0.45)  | 502 (0.8%)                | 11 (0.9%)                      | 45.64        | 0.27* (0.15-0.51)  | 16.90* (8.40-34.00)                                  | 0.88 (0.43-1.81)                                     |
|                            | Mixed/other              | 164 (0.8%)                              | 72 (1.4%)                      | 2.28        | 0.26* (0.20-0.35)  | 503 (0.8%)                | 27 (2.2%)                      | 18.63        | 0.11* (0.07-0.17)  | 8.18* (5.08-13.17)                                   | 0.42* (0.25-0.71)                                    |
|                            | Not stated               | 78 (0.4%)                               | 110 (2.2%)                     | 0.71        | 0.08* (0.06-0.11)  | 610 (1.0%)                | 51 (4.1%)                      | 11.96        | 0.07* (0.05-0.10)  | 16.87* (11.23-25.34)                                 | 0.88 (0.56-1.37)                                     |
|                            | <b>Subtotal</b>          | <b>3,366 (16.1%)</b>                    | <b>1,016 (20.2%)</b>           | <b>3.31</b> | <b>N/A</b>         | <b>9,858 (16.6%)</b>      | <b>285 (23.1%)</b>             | <b>34.59</b> | <b>N/A</b>         | <b>10.44* (9.10-11.97)</b>                           | <b>N/A</b>                                           |
| South of England           | White                    | 3,138 (15.0%)                           | 482 (9.6%)                     | 6.51        | 0.75* (0.67-0.85)  | 7,646 (12.9%)             | 111 (9.0%)                     | 68.88        | 0.41* (0.32-0.53)  | 10.58* (8.57-13.06)                                  | 0.55* (0.42-0.73)                                    |
|                            | Black African            | 42 (0.2%)                               | 87 (1.7%)                      | 0.48        | 0.06* (0.04-0.08)  | 69 (0.1%)                 | 34 (2.8%)                      | 2.03         | 0.01* (0.01-0.02)  | 4.20* (2.42-7.30)                                    | 0.22* (0.12-0.39)                                    |
|                            | Black other              | 37 (0.2%)                               | 23 (0.5%)                      | 1.61        | 0.19* (0.11-0.31)  | 80 (0.1%)                 | 11 (0.9%)                      | 7.27         | 0.04* (0.02-0.08)  | 4.52* (2.00-10.24)                                   | 0.23* (0.10-0.54)                                    |
|                            | Asian                    | 118 (0.6%)                              | 41 (0.8%)                      | 2.88        | 0.33* (0.23-0.48)  | 403 (0.7%)                | 12 (1.0%)                      | 33.58        | 0.20* (0.11-0.37)  | 11.67* (5.94-22.92)                                  | 0.61 (0.30-1.22)                                     |
|                            | Mixed/other              | 173 (0.8%)                              | 55 (1.1%)                      | 3.15        | 0.36* (0.27-0.50)  | 463 (0.8%)                | 12 (1.0%)                      | 38.58        | 0.23* (0.13-0.42)  | 12.27* (6.41-23.46)                                  | 0.64 (0.32-1.25)                                     |
|                            | Not stated               | 192 (0.9%)                              | 82 (1.6%)                      | 2.34        | 0.27* (0.21-0.35)  | 486 (0.8%)                | 29 (2.4%)                      | 16.76        | 0.10* (0.07-0.15)  | 7.16* (4.54-11.28)                                   | 0.37* (0.23-0.61)                                    |
|                            | <b>Subtotal</b>          | <b>3,700 (17.7%)</b>                    | <b>770 (15.3%)</b>             | <b>4.81</b> | <b>N/A</b>         | <b>9,147 (15.4%)</b>      | <b>209 (16.9%)</b>             | <b>43.77</b> | <b>N/A</b>         | <b>9.11* (7.78-10.66)</b>                            | <b>N/A</b>                                           |

<sup>3</sup> Here Black other includes people of Black Caribbean ethnicity.

\* p-value&lt;0.01

\*\* p-value&lt;0.1

**Table 5.** Distribution of the number of PrEP users and PrEP need in England during the pre- (PrEP Impact Trial – October 2017 to February 2020) and post-commissioning (2021) period of PrEP by Index of Multiple Deprivation (IMD) and gender

| IMD                           | Gender          | Pre-commissioning (Oct 2017 – Feb 2020) |                           |             |                                  | Pre-commissioning (Oct 2017 – Feb 2020) |                           |              |                                  | Pre- to post-commissioning comparisons within groups | Pre- to post-commissioning comparisons across groups |
|-------------------------------|-----------------|-----------------------------------------|---------------------------|-------------|----------------------------------|-----------------------------------------|---------------------------|--------------|----------------------------------|------------------------------------------------------|------------------------------------------------------|
|                               |                 | PrEP users N (%)                        | Non-late new HIV dx N (%) | PnR         | PnR relative difference (95% CI) | PrEP users N (%)                        | Non-late new HIV dx N (%) | PnR          | PnR relative difference (95% CI) | PnR relative difference (95% CI)                     | PnR relative difference (95% CI)                     |
| 5th Quintile - least deprived | Men             | 1,973 (9.3%)                            | 294 (5.9%)                | 6.71        | Baseline group                   | 5,254 (8.7%)                            | 50 (4.1%)                 | 105.08       | Baseline group                   | 15.66* (11.55-21.23)                                 | Baseline group                                       |
|                               | Women           | 60 (0.3%)                               | 72 (1.4%)                 | 0.83        | 0.12* (0.09-0.18)                | 92 (0.2%)                               | 20 (1.6%)                 | 4.60         | 0.04* (0.03-0.08)                | 5.52* (3.05-9.98)                                    | 0.35* (0.18-0.69)                                    |
|                               | <b>Subtotal</b> | <b>2,035 (9.6%)</b>                     | <b>367 (7.3%)</b>         | <b>5.54</b> | <b>N/A</b>                       | <b>5,624 (9.3%)</b>                     | <b>71 (5.8%)</b>          | <b>79.21</b> | <b>N/A</b>                       | <b>14.29* (11.02-18.51)</b>                          | <b>N/A</b>                                           |
| 4th Quintile                  | Men             | 2,960 (13.9%)                           | 473 (9.4%)                | 6.26        | 0.93 (0.80-1.09)                 | 8,354 (13.8%)                           | 107 (8.7%)                | 78.07        | 0.74** (0.53-1.04)               | 12.48* (10.07-15.45)                                 | 0.80 (0.55-1.16)                                     |
|                               | Women           | 85 (0.4%)                               | 94 (1.9%)                 | 0.90        | 0.13* (0.10-0.19)                | 204 (0.3%)                              | 37 (3.0%)                 | 5.51         | 0.05* (0.03-0.08)                | 6.10* (3.86-9.63)                                    | 0.39* (0.22-0.67)                                    |
|                               | <b>Subtotal</b> | <b>3,051 (14.3%)</b>                    | <b>567 (11.3%)</b>        | <b>5.38</b> | <b>N/A</b>                       | <b>8,925 (14.8%)</b>                    | <b>144 (11.7%)</b>        | <b>61.98</b> | <b>N/A</b>                       | <b>11.52* (9.55-13.89)</b>                           | <b>N/A</b>                                           |
| 3rd Quintile                  | Men             | 4,443 (20.9%)                           | 687 (13.7%)               | 6.47        | 0.96 (0.83-1.12)                 | 12,302 (20.4%)                          | 154 (12.5%)               | 79.88        | 0.76** (0.55-1.05)               | 12.35* (10.34-14.76)                                 | 0.79 (0.55-1.12)                                     |
|                               | Women           | 126 (0.6%)                              | 180 (3.6%)                | 0.70        | 0.10* (0.08-0.14)                | 219 (0.4%)                              | 58 (4.7%)                 | 3.78         | 0.04* (0.02-0.05)                | 5.39* (3.73-7.80)                                    | 0.34* (0.21-0.56)                                    |
|                               | <b>Subtotal</b> | <b>4,576 (21.5%)</b>                    | <b>868 (17.3%)</b>        | <b>5.27</b> | <b>N/A</b>                       | <b>12,917 (21.4%)</b>                   | <b>212 (17.2%)</b>        | <b>60.93</b> | <b>N/A</b>                       | <b>11.56* (9.91-13.48)</b>                           | <b>N/A</b>                                           |
| 2nd Quintile                  | Men             | 6,690 (31.4%)                           | 1,112 (22.2%)             | 6.02        | 0.90 (0.78-1.03)                 | 18,768 (31.1%)                          | 225 (18.2%)               | 83.41        | 0.79 (0.58-1.08)                 | 13.86* (11.98-16.04)                                 | 0.89 (0.63-1.24)                                     |
|                               | Women           | 169 (0.8%)                              | 322 (6.4%)                | 0.52        | 0.08* (0.06-0.10)                | 369 (0.6%)                              | 82 (6.6%)                 | 4.50         | 0.04* (0.03-0.06)                | 8.57* (6.33-11.61)                                   | 0.55* (0.36-0.84)                                    |
|                               | <b>Subtotal</b> | <b>6,876 (32.3%)</b>                    | <b>1,434 (28.6%)</b>      | <b>4.79</b> | <b>N/A</b>                       | <b>19,628 (32.5%)</b>                   | <b>307 (24.9%)</b>        | <b>63.93</b> | <b>N/A</b>                       | <b>13.33* (11.75-15.13)</b>                          | <b>N/A</b>                                           |
| 1st Quintile - most deprived  | Men             | 4,248 (20.0%)                           | 933 (18.6%)               | 4.55        | 0.68* (0.59-0.78)                | 11,512 (19.1%)                          | 273 (22.1%)               | 42.17        | 0.40* (0.30-0.54)                | 9.26* (8.06-10.65)                                   | 0.59* (0.42-0.83)                                    |
|                               | Women           | 160 (0.8%)                              | 363 (7.2%)                | 0.44        | 0.07* (0.05-0.08)                | 295 (0.5%)                              | 110 (8.9%)                | 2.68         | 0.03* (0.02-0.04)                | 6.08* (4.57-8.11)                                    | 0.39* (0.26-0.59)                                    |
|                               | <b>Subtotal</b> | <b>4,418 (20.7%)</b>                    | <b>1,296 (25.8%)</b>      | <b>3.41</b> | <b>N/A</b>                       | <b>12,187 (20.2%)</b>                   | <b>383 (31.0%)</b>        | <b>31.82</b> | <b>N/A</b>                       | <b>9.33* (8.29-10.51)</b>                            | <b>N/A</b>                                           |
| Not reported                  | Men             | 312 (1.5%)                              | 298 (5.9%)                | 1.05        | 0.16* (0.13-0.19)                | 979 (1.6%)                              | 86 (7.0%)                 | 11.38        | 0.11* (0.08-0.15)                | 10.87* (8.29-14.27)                                  | 0.69** (0.46-1.04)                                   |
|                               | Women           | 23 (0.1%)                               | 188 (3.7%)                | 0.12        | 0.02* (0.01-0.03)                | 019 (0.0%)                              | 31 (2.5%)                 | 0.61         | 0.01* (0.00-0.01)                | 5.01* (2.45-10.26)                                   | 0.32* (0.15-0.70)                                    |
|                               | <b>Subtotal</b> | <b>336 (1.6%)</b>                       | <b>487 (9.7%)</b>         | <b>0.69</b> | <b>N/A</b>                       | <b>1,103 (1.8%)</b>                     | <b>117 (9.5%)</b>         | <b>9.43</b>  | <b>N/A</b>                       | <b>13.66* (10.79-17.30)</b>                          | <b>N/A</b>                                           |

\* p-value&lt;0.01

\*\* p-value&lt;0.1
